# Supplementary material for: Cortical dynein drives centrosome clustering in cells with centrosome amplification
Source: PubMed Central journal article supplement — Mol Biol Cell. 2023 May 5;34(6):ar63. doi: 10.1091/mbc.E22-07-0296 (PMC10208098; doi:10.1091/mbc.e22-07-0296), 2023-05-05
Supplement: mbc-34-ar63-s001.pdf [file mbc-34-ar63-s001.pdf]

Supplementary Materials  
*Molecular Biology of the Cell*  
Mercadante *et al.*

## Supplemental Material

### Table Captions

Table S1: Parameters. All parameter values without reference are approximated to match biological results.

### Figure Captions

Figure S1: Graphical representation and validation of experimental conditions used in Figures 1, 2, and 3. (A) Representative NuMA cortical enrichment ratios calculated as peak intensity at the cortex/peak intensity within the cytoplasm along a radius that extends through individual spindle poles. (B) Quantification of the fraction of mitotic cells exhibiting each pattern of NuMA enrichment ratios represented in panel (A). (C) Representative fixed-cell images of NuMA and dynein (p150) staining in the control (siScr), as well as in the Afadin and LGN depleted cells (siLGN and siAfadin, respectively). (D,E,F) Overview of the experimental timeline for induction of centrosome amplification and disruption of cortical dynein localization in cell culture. (D,E, left) Depiction of the experimental timelines to induce siRNA-based depletion of Afadin or LGN in mitotic RPE cells concurrently induced to have centrosome amplification through either overexpression of PLK4 (D) or dihydrocytochalasin B (DCB)-induced cytokinesis failure (E). (D,middle) Quantification of the number of centrioles in the indPLK4 cells. (D,E, right) Relative expression of Afadin (siAfa) or LGN (siLGN) following indicated duration of siRNA-mediated depletion of Afadin and LGN. (F) Timeline (left) with quantification of centrosome number (middle) and relative expression of Afadin (siAfa) or LGN (siLGN) after 72 h or 48 h, respectively, of siRNA-mediated depletion in MDA-MB-231 cancer cells (right). Controls are denoted by siCtl in (D,E,F). Significance determined by student's *t*-test; \*\*\* $p < 0.001$ , \*\*\*\* $p < 0.0001$ .

Figure S2: Microtubule dynamics and motor-derived forces are dependent on probabilities of binding and/or distances between microtubule and motor. (A) Schematic of the mitotic spindle and microtubule-motor protein interactions. Arrows depict the directional movement of the motor along the microtubule. (B) Schematic representation of stochastic microtubule states (left) and microtubule-motor protein interactions (right).

Figure S3: Centrosome movement and clustering is similar with 3, 4, 5, and 6 centrosomes. (A-C) Four centrosomes. Top: Trace of centrosome movement over time through the duration of a simulation. Bottom: Heat map representing the pairwise distances between all centrosome pairs indicated in the corresponding traces. From left to right, the case of enriched dynein in a region of  $\pi/2$  in (A), uniform dynein in (B), and no dynein in (C). (D-F) Traces of five centrosomes for the case of enriched dynein in a region of  $\pi/2$  in (D), uniform dynein in (E), and no dynein in (F). (G-I) Traces of six centrosomes for the case of enriched dynein in a region of  $\pi/2$  in (G), uniform dynein in (H), and no dynein in (I). In the top panel of (A-C), along with panels (D-I), a red 'x' indicates initial centrosome position and a blue '\*' indicates centrosome position at 30 minutes. Numbers mark individual centrosomes, grayscale indicates time, and pink on the cell boundary indicates the region of high dynein localization (where  $P_{d_{cor}} = 0.5$ ; elsewhere  $P_{d_{cor}} = 0.01$ ).

Figure S4: Computational models suggest centrosome clustering is sensitive to the size of the region of cortical dynein activity. (A-D) Top: Trace of centrosome movement over time through the duration of a simulation where a red ‘x’ indicates initial centrosome position, a blue ‘\*’ indicates centrosome position at 30 minutes. Numbers mark individual centrosomes, grayscale indicates time, and pink on the cell boundary indicates the region of high dynein activity (where  $P_{d_{cor}} = 0.5$ ; elsewhere  $P_{d_{cor}} = 0.01$ ). Dynein is enriched in a region of size  $\pi/8$ ,  $\pi/4$ ,  $3\pi/4$ , and  $\pi$  in panels A, B, C, and D, respectively. Bottom: Heat map representing the pairwise distances between all centrosome pairs indicated in the corresponding traces. (E) The percent of simulations with three or four centrosomes that achieve a bipolar spindle (each of the two poles with one or more clustered centrosomes) when cortical dynein activity is enriched in a region of size  $\frac{\pi}{8}$ ,  $\frac{\pi}{4}$ ,  $\frac{\pi}{2}$  (3 centrosome condition represented in Figure 4 A,B),  $\frac{3\pi}{4}$ , and  $\pi$ .

Figure S5: Centrosome movement in computational simulations is driven by cortical dynein activity. (A,B) Plots depicting the magnitude of cortical dynein-derived forces over time (red bars, scale on left axis) and the distance between each centrosome and the midpoint of dynein enrichment (blue trace, scale on right axis) from the simulation with dynein enriched in the angular region from 0 to  $\pi/2$  in A and uniform dynein in B (corresponding to simulations in Figure 4 B and D, respectively). (C) Distance between each centrosome and the region of dynein enrichment. (D) Distance between centrosome pairs. For simulations with uniform dynein, the distance is calculated as the minimum distance to the cell boundary. (E) Average number of peaks in cortical-dynein-derived force in simulations. In (C-E), noD, uD, and ( $\pi/2$ )D correspond to the cases of no dynein, uniformly distributed dynein, or dynein restricted to the angular region from 0 to  $\pi/2$ . Each dot represents a single centrosome’s position (C), centrosome pair (D), or simulation (E). Quantification performed on 30 simulations from each condition. Significance determined by one-way ANOVA with Tukey’s test for multiple comparisons; \* $p < 0.05$ , \*\*\*\* $p < 0.0001$ .

Figure S6: Computational modeling indicates that all motor and non-motor derived forces are dynamic over time. Plots depicting the magnitude of each force (scale on left axis) on each centrosome, and the corresponding centrosome position relative to the cell cortex (blue trace, scale on right axis) over time. Plots correspond to simulations as follows: (A) Figure 4 B, (B) Figure 4 D, and (C) Figure 4 E.

Figure S7: Asymmetric and dynamic cortical dynein localization aids centrosome clustering during computational modeling of spindle formation. A-C Top: Traces of centrosome movement over time from a simulation with enriched region of cortical dynein localization (with  $P_{d_{cor}} = 0.5$ ) oscillating between the upper-right (solid pink arc, 0 to  $\pi/2$ ) and lower-left quadrant (dashed pink arc,  $-\pi$  to  $-\pi/2$ ) of the cell with a period of  $T = 1.67$  min (A) and  $T = 2.33$  min (B). In (C), enrichment is only up to  $T = 15$  min and then there is no dynein enrichment for  $T \geq 15$  ( $P_{d_{cor}} = 0.01$  everywhere on the cortex). Initial centrosome position indicated by a red ‘x’ and final centrosome position is indicated by a blue ‘\*’. Color bar is time. A-C Bottom: Heat map representing the pairwise distances between all centrosome pairs from the simulation represented above. Black dotted lines indicate a timepoint when cortical dynein localization is redistributed. Color bar is distance. (D) Plots depicting the magnitude of cortical dynein-derived forces over time (red bars, scale on left axis) and the distance (blue traces, scale on right axis) between each centrosome and the midpoint of dynein localization from the simulation shown in (C).

Figure S8: Spindle length and dynein-derived forces are dynamic over time in cells with two centrosomes. (A) Traces of bipolar spindle length from 5 simulations with asymmetric dynein localization. (B) Traces of centrosome movement over time from a simulation with asymmetric dynein localization. Colorbar is time. (C) Plots depicting the magnitude of cortical dynein-derived forces (pink bars, scale on left axis) over time and the distance (blue trace, shown on right axis) between each centrosome and the midpoint of dynein localization from the simulation shown in (B).

A

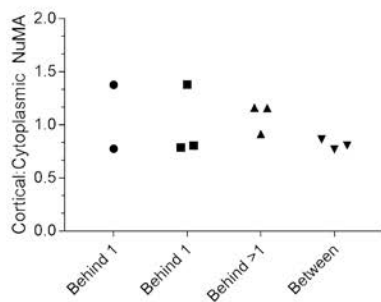

B

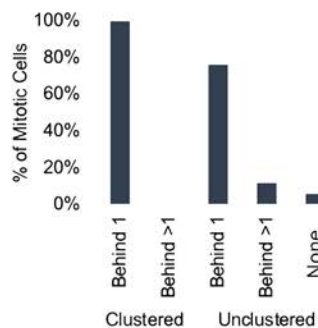

C

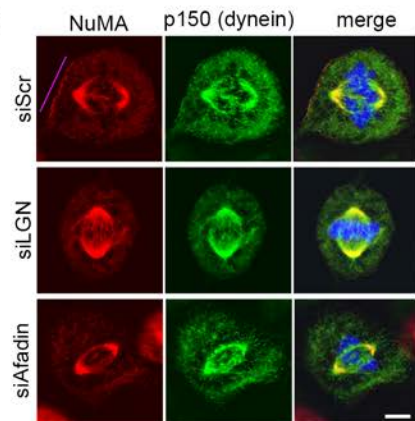

D

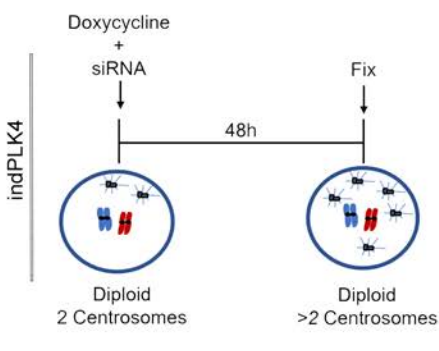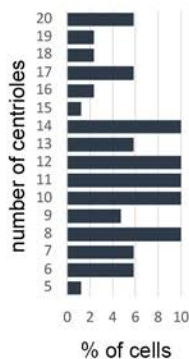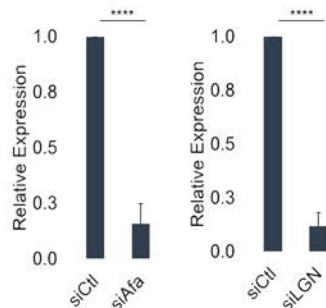

E

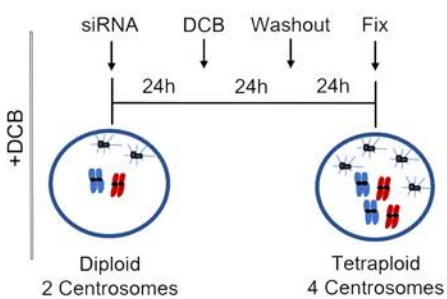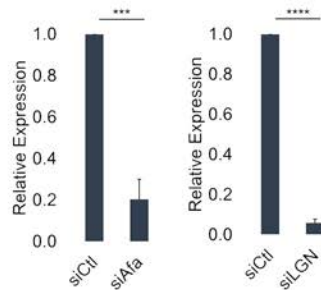

F

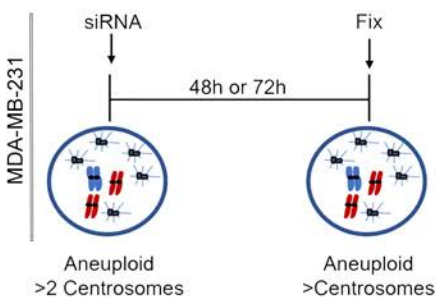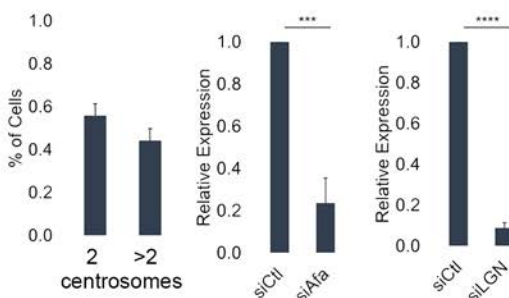

A

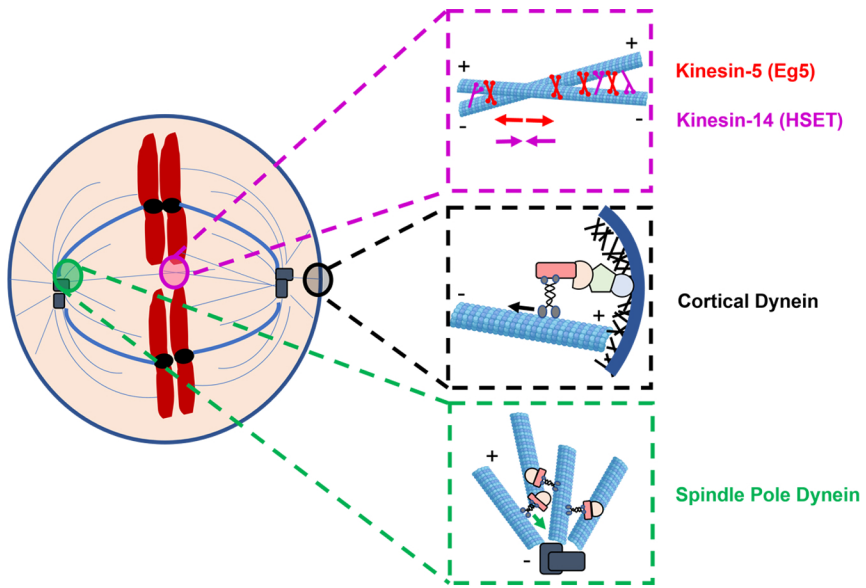

B

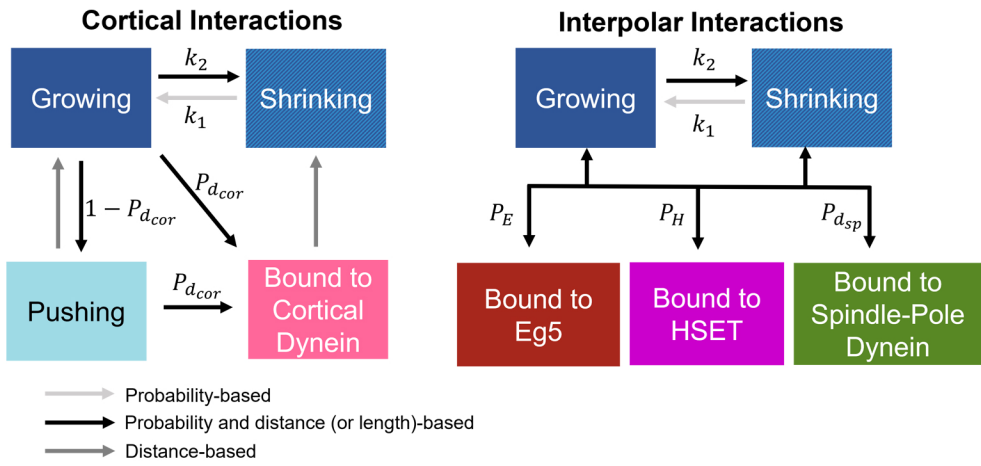

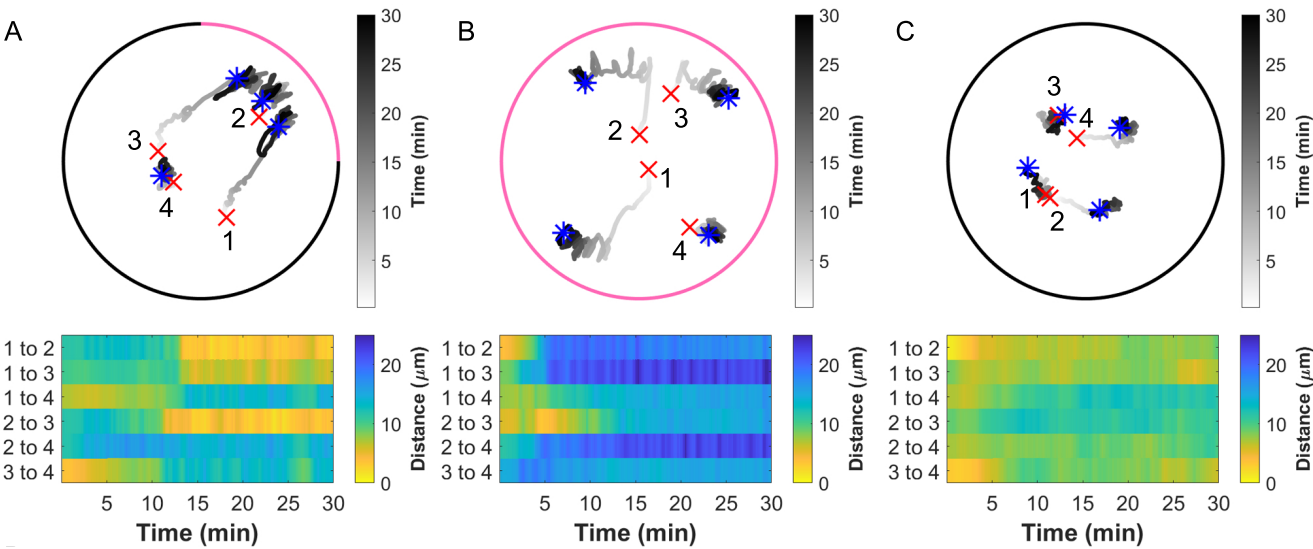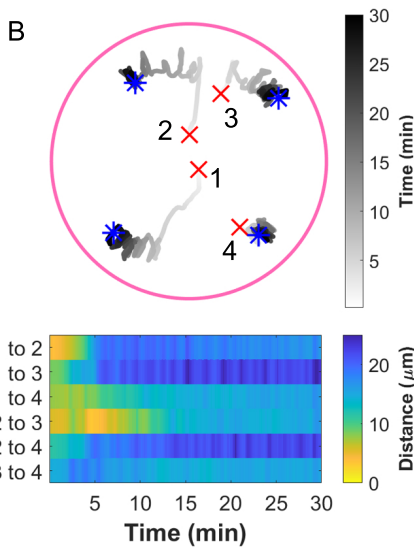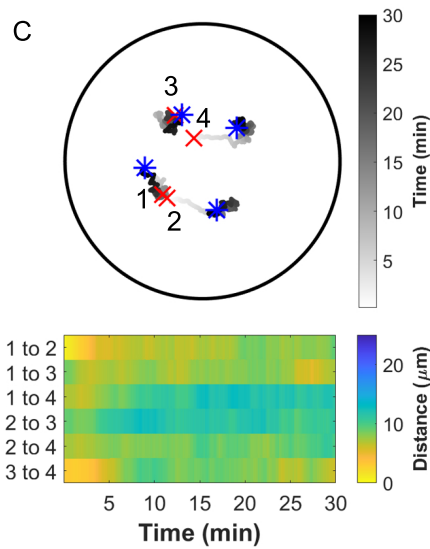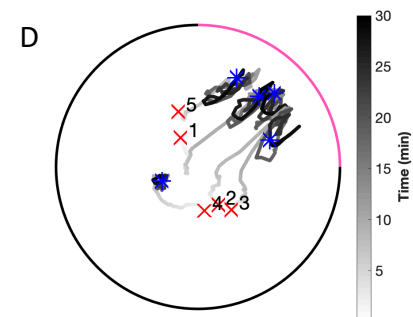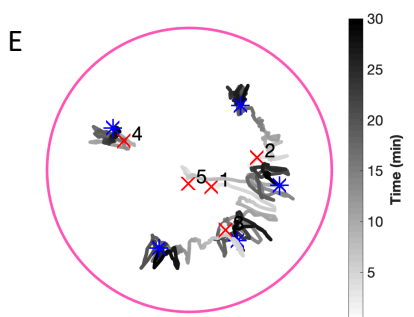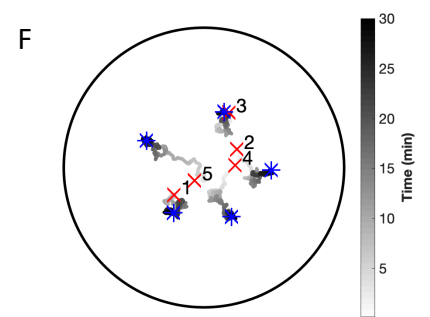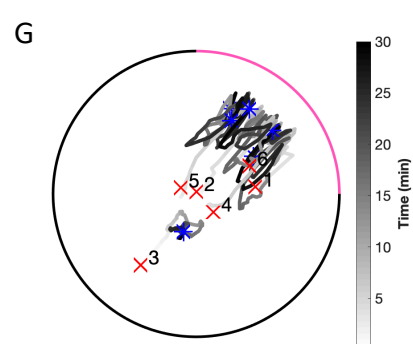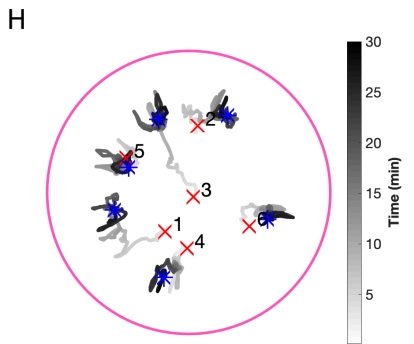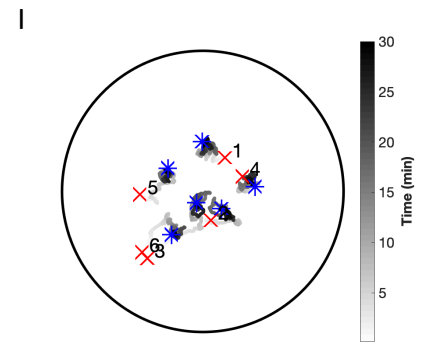

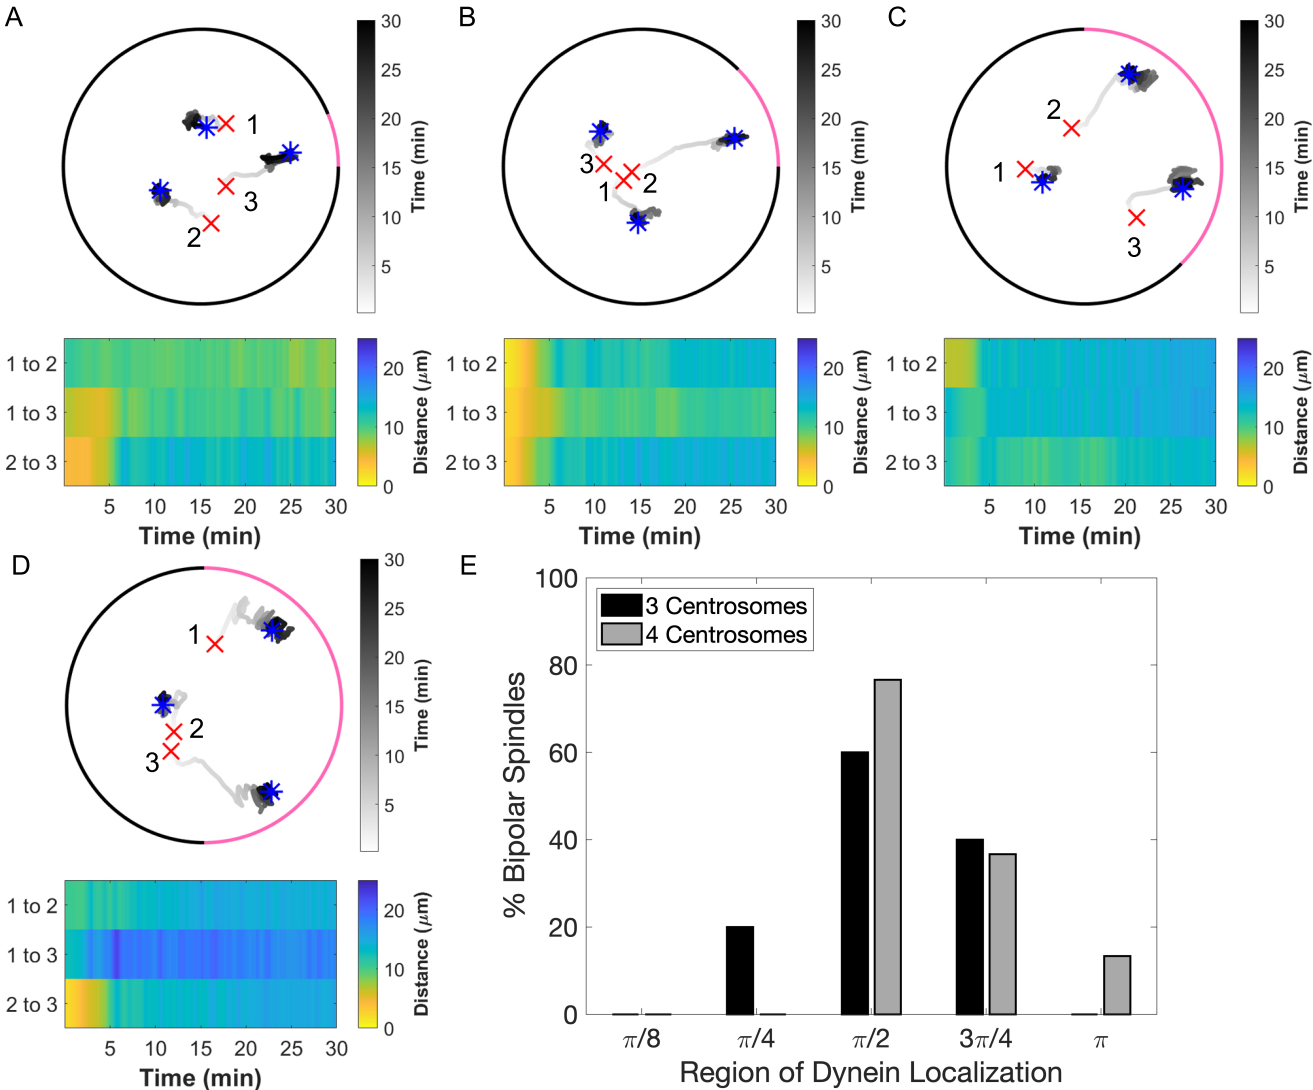

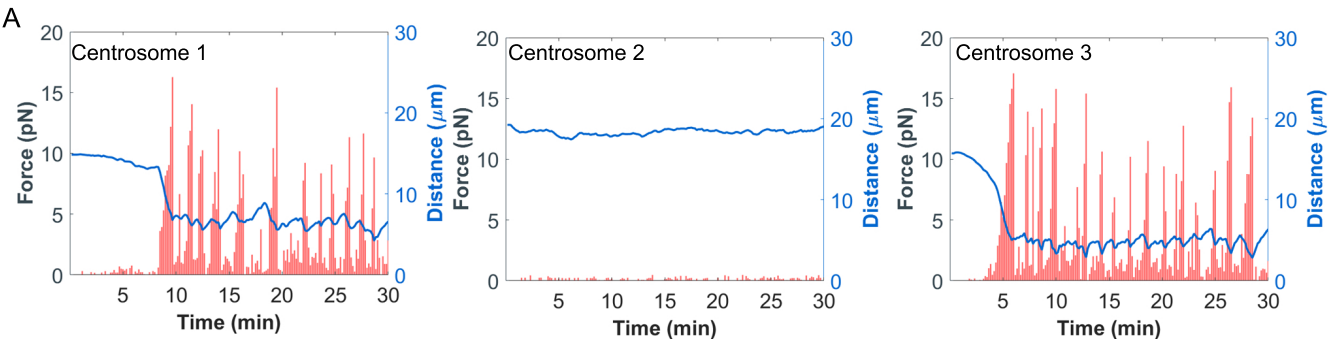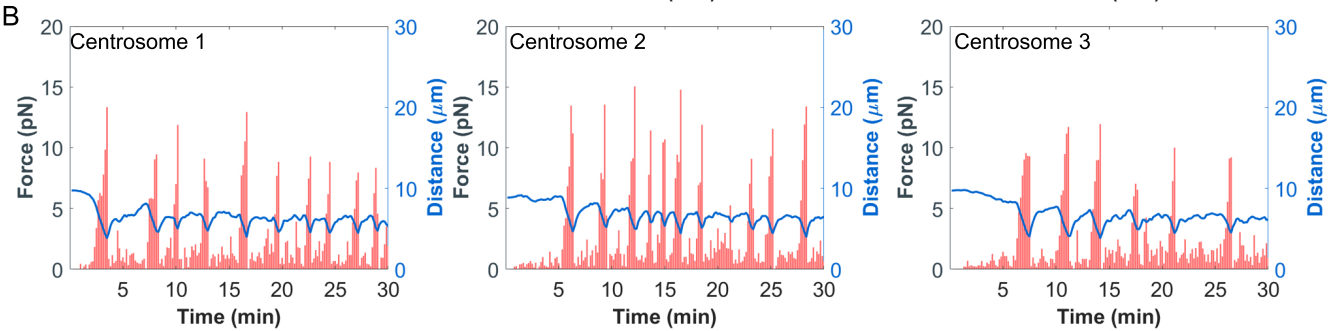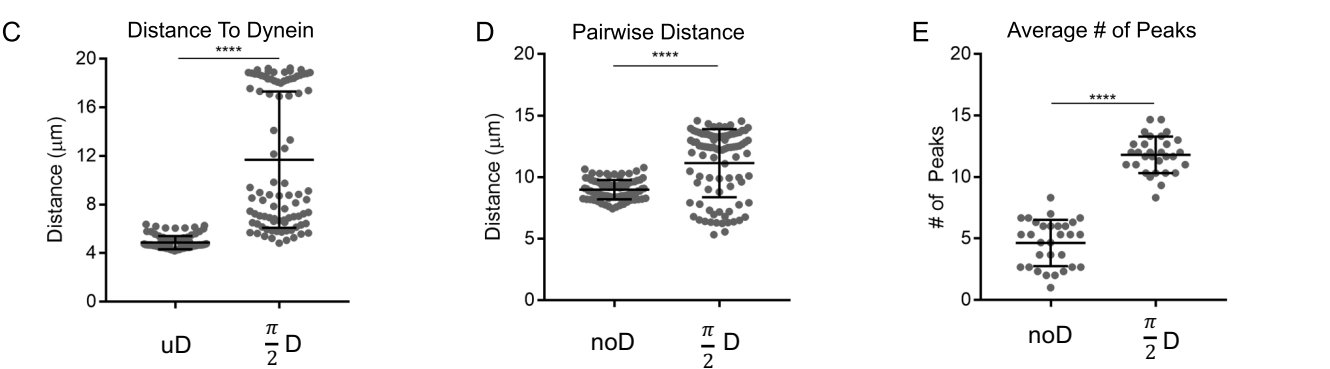



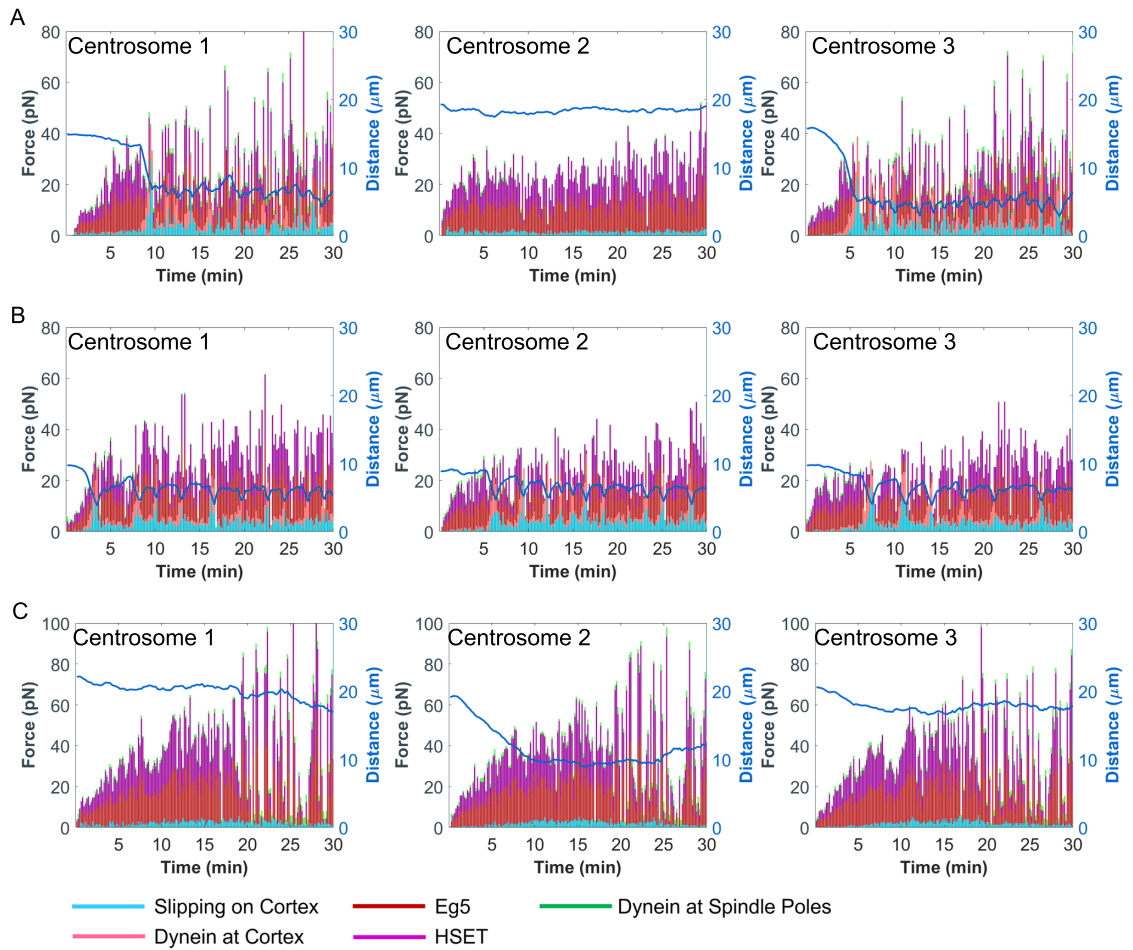

Figure S6: All motor and non-motor derived forces are dynamic over time. Plots depicting the magnitude of each force (scale on left axis) on each centrosome, and the corresponding centrosome position relative to the cell cortex (blue trace, scale on right axis) over time. Plots correspond to simulations as follows: (A) Figure 4B, (B) Figure 4D, and (C) Figure 4E.

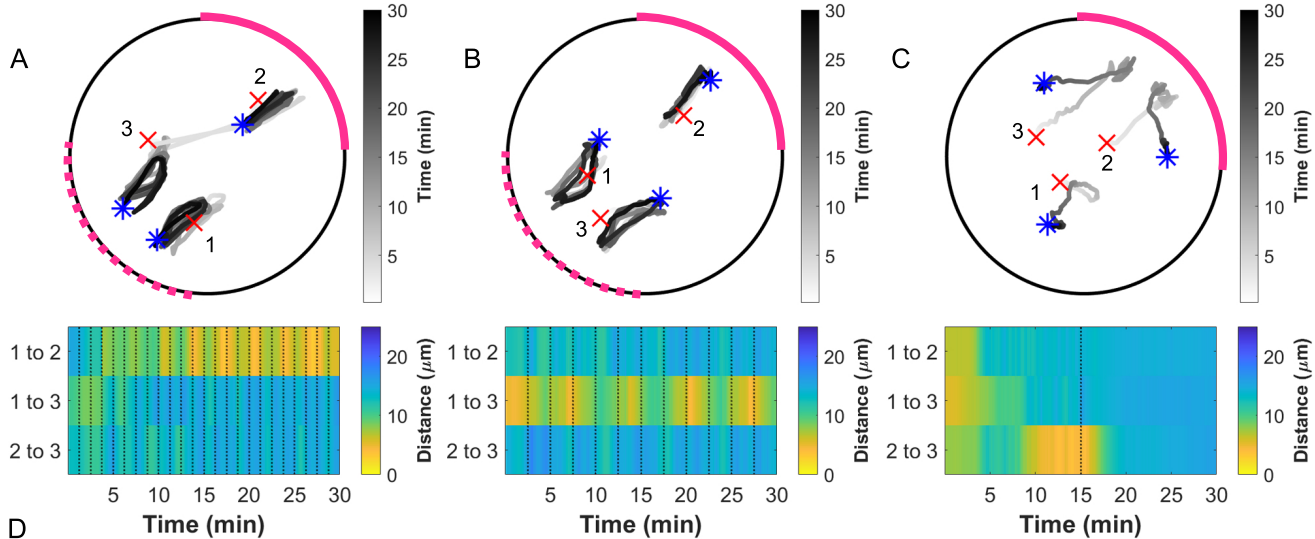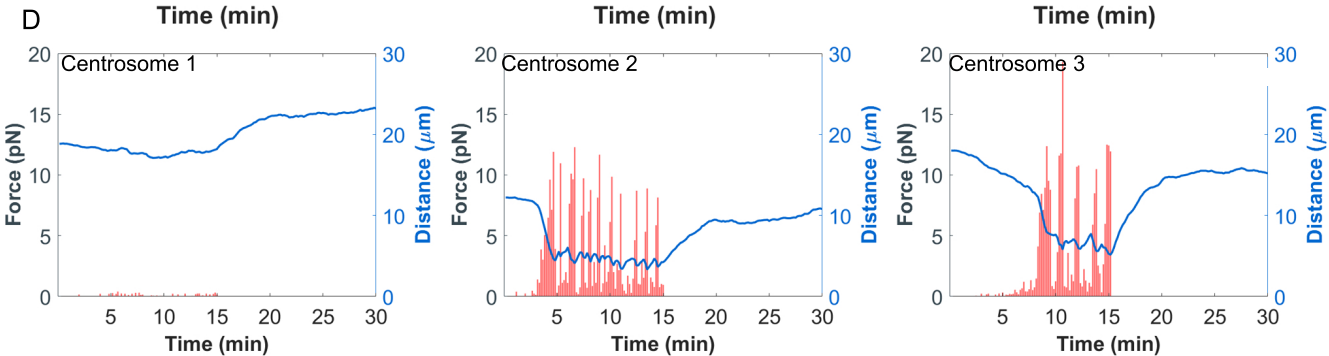

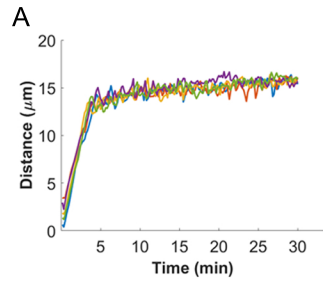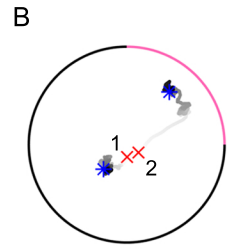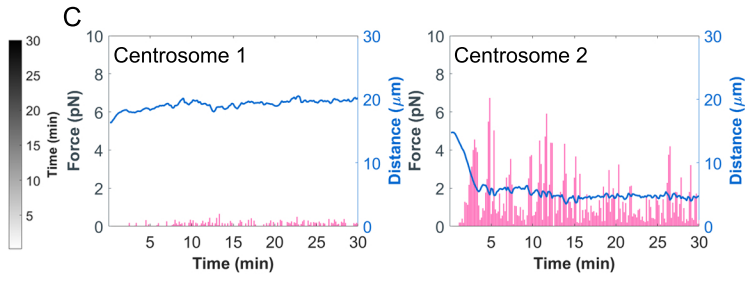

Table S1: Parameters. All parameter values without reference are approximated to match biological results.

| Parameter                      | Value                            | Description                                                         | Reference                                                              |
|--------------------------------|----------------------------------|---------------------------------------------------------------------|------------------------------------------------------------------------|
| <b>Microtubules</b>            |                                  |                                                                     |                                                                        |
| $v_g$                          | $0.183 \mu\text{ms}^{-1}$        | Microtubule growth velocity (+ ends)                                | Piehl and Cassimeris (2003),<br>Wu et al. (2011)                       |
| $v_s$                          | $0.3 \mu\text{ms}^{-1}$          | Microtubule shrinking velocity (+ ends)                             | Wu et al. (2011)                                                       |
| $v_b$                          | $0.057 \mu\text{ms}^{-1}$        | Microtubule shrinking velocity (+ ends)<br>bound to cortical dynein | Laan et al. (2012)                                                     |
| $k_1$                          | $0.167 \text{s}^{-1}$            | Rescue frequency                                                    | Wu et al. (2011),<br>Komarova et al. (2002)                            |
| $\kappa$                       | $10 \text{pN}\mu\text{m}^2$      | Bending rigidity                                                    | Laan et al. (2012),<br>Li and Jiang (2017),<br>Kikumotot et al. (2006) |
| $f_{\text{stall}}$             | $5 \text{pN}$                    | Stall force of microtubules                                         | Ma et al. (2013)                                                       |
| $MT_{\text{nuc}}$              | $2 \text{s}^{-1}$                | Microtubule nucleation rate<br>per centrosome                       | Piehl et al. (2004)                                                    |
| $\theta$                       | $10\pi/180$                      | Slipping microtubule angle change                                   |                                                                        |
| <b>Motor Proteins</b>          |                                  |                                                                     |                                                                        |
| <i>Dynein</i>                  |                                  |                                                                     |                                                                        |
| $f_{0,d}$                      | $3.6 \text{pN}$                  | Stall force of dynein                                               | Elshenawy et al. (2019)                                                |
| $v_{0,d}$                      | $0.86 \mu\text{ms}^{-1}$         | Walking velocity of dynein                                          | Urnavicius et al. (2018),<br>Elshenawy et al. (2019)                   |
| $P_{d_{\text{cor}}}$           | $0.5$                            | Probability of binding to<br>cortical dynein                        |                                                                        |
| $P_{d_{\text{sp}}}$            | $0.3$                            | Probability of binding to<br>spindle pole dynein                    |                                                                        |
| $\mathcal{D}_{d_{\text{cor}}}$ | $4v_g(dt) \mu\text{m}$           | Distance required for binding<br>to cortical dynein                 |                                                                        |
| $\mathcal{D}_{d_{\text{sp}}}$  | $1 \mu\text{m}$                  | Distance required for binding<br>to dynein at spindle poles         |                                                                        |
| <i>Kinesin-5 (Eg5)</i>         |                                  |                                                                     |                                                                        |
| $f_{0,Eg5}$                    | $1.5 \text{pN}$                  | Stall force of Eg5                                                  | Shimamoto et al. (2015)                                                |
| $v_{0,Eg5}$                    | $0.2 \mu\text{ms}^{-1}$          | Walking velocity of Eg5                                             | Li et al. (2019)                                                       |
| $P_E$                          | $0.5$                            | Probability of binding to Eg5                                       |                                                                        |
| <i>Kinesin-14 (HSET)</i>       |                                  |                                                                     |                                                                        |
| $f_{0,HSET}$                   | $1.1 \text{pN}$                  | Stall force of HSET                                                 | Roostalu et al. (2018)                                                 |
| $v_{0,HSET}$                   | $0.2 \mu\text{ms}^{-1}$          | Walking velocity of HSET                                            | Li et al. (2019)                                                       |
| $P_H$                          | $0.7$                            | Probability of binding to HSET                                      |                                                                        |
| $\mathcal{D}_{Eg5,HSET}$       | $v_g dt \mu\text{m}$             | Distance required for binding<br>to Eg5 or HSET                     |                                                                        |
| <b>Other</b>                   |                                  |                                                                     |                                                                        |
| $r$                            | $15 \mu\text{m}$                 | Radius of the cell                                                  |                                                                        |
| $c_r$                          | $0.3 \mu\text{m}$                | Radius of a centrosome                                              |                                                                        |
| $\mathcal{D}_r$                | $2 \mu\text{m}$                  | Distance for repulsive forces                                       |                                                                        |
| $K$                            | $0.35$                           | Microtubule length-dependent scaling factor                         |                                                                        |
| $C$                            | $0.01$                           | Antiparallel crosslinking scaling factor                            |                                                                        |
| $s$                            | $0.075 \mu\text{m}^{-1}$         | Scaling for catastrophe frequency                                   |                                                                        |
| $R$                            | $1 \mu\text{m}$                  | Scaling for repulsive forces                                        |                                                                        |
| $\mu$                          | $0.7 \text{pNs}\mu\text{m}^{-2}$ | Viscosity of the cytoplasm                                          | Luby-Phelps et al. (1993)                                              |
| $\xi$                          | $41.2 \text{pNs}$                | Drag coefficient                                                    |                                                                        |
